# Supplementary material for: Melatonin May Increase Anticancer Potential of Pleiotropic Drugs
Source: Int J Mol Sci. 2018 Dec 6;19(12):3910. doi: 10.3390/ijms19123910 (PMC6320927; doi:10.3390/ijms19123910)
Supplement: Supplementary file 1 [file ijms-19-03910-s001.pdf]

**Table S1.** Oncostatic effects of melatonin (MEL) added to treatment with chosen pleiotropic drugs/chemotherapeutics in vivo and in human trials.

| Species,<br>strain/study          | Tumor<br>site    | Initiating<br>agent | Chemopreventive/<br>chemotherapeutic<br>agent | Effect on tumor<br>growth:<br>chemopreventive<br>agent(s)                                                 | Effect on tumor growth:<br>MEL                                           | Effect of<br>combination with<br>MEL compared to<br>single agent                                            | Reference |
|-----------------------------------|------------------|---------------------|-----------------------------------------------|-----------------------------------------------------------------------------------------------------------|--------------------------------------------------------------------------|-------------------------------------------------------------------------------------------------------------|-----------|
| Female<br>Sprague-<br>Dawley rats | Mammary<br>gland |                     | DMBA                                          | ↓ tumor incidence,<br>frequency and<br>volume<br>↑ latency                                                | ↓ tumor incidence and<br>frequency                                       | ↓ tumor incidence<br>(ns)                                                                                   | [208]     |
|                                   |                  |                     | Indomethacin                                  | ↑ tumor volume                                                                                            |                                                                          |                                                                                                             |           |
|                                   |                  |                     | NMU                                           | ↑ tumor incidence<br>(ns)<br>↓ latency (ns)                                                               | ↓ tumor volume<br>↓ tumor frequency (ns)                                 | ↑ latency (ns)<br>↓ tumor volume (ns)                                                                       | [209]     |
|                                   |                  |                     | DMBA                                          | ≈                                                                                                         | ↓ tumor incidence<br>↓ tumor frequency and<br>volume (ns)                | ↓ tumor volume<br>↓ tumor frequency<br>(ns)                                                                 | [210]     |
|                                   |                  |                     | Nimesulide                                    | ↓ tumor incidence<br>and frequency<br>↓ tumor volume                                                      | ↑ tumor volume<br>↓ tumor incidence (ns)                                 | ↑ latency (ns)                                                                                              |           |
|                                   |                  |                     | NMU                                           | ↓ tumor frequency<br>↓ tumor incidence<br>(ns)                                                            | ↓ tumor frequency (ns)<br>↑ latency (ns)                                 | ↑ latency (ns)                                                                                              |           |
|                                   |                  |                     | Celecoxib                                     | ↓ tumor nodules<br>↑ survival<br>↓ oxidative stress                                                       | ↓ tumor nodules<br>↑ survival<br>↓ lung metastases<br>↓ oxidative stress |                                                                                                             | [212]     |
|                                   |                  |                     |                                               | ↑ apoptosis<br>↓ tumor volume<br>↓ HG tumor<br>proportion<br>↑ proliferation<br>↓ tumor frequency<br>(ns) |                                                                          | ↑ apoptosis<br>↓ proliferation<br>↓ tumor frequency<br>and volume<br>↑ latency<br>↓ tumor incidence<br>(ns) |           |
|                                   |                  |                     | Pravastatin                                   |                                                                                                           | -                                                                        |                                                                                                             | [235]     |
|                                   |                  |                     | Pitavastatin                                  | ↑ apoptosis<br>↓ proliferation<br>↓ tumor volume<br>↑ latency (ns)                                        | -                                                                        | ↓ VEGF expression<br>↓ tumor frequency<br>(ns)                                                              | [236]     |
| Male SHR<br>mice                  | Skin             | BP                  | Metformin                                     | ↓ tumor incidence,<br>frequency and<br>volume<br>↑ latency and<br>survival                                | ↓ tumor incidence,<br>frequency and volume<br>↑ latency and survival     | ↓ tumor incidence,                                                                                          | [273]     |
| Female SHR<br>mice                |                  |                     |                                               | ↓ tumor frequency<br>and volume                                                                           | ↓ tumor volume<br>↓ tumor incidence (ns)<br>↑ latency (ns)               | ↓ tumor incidence<br>(ns)                                                                                   | [274]     |

| Species,<br>strain/study            | Tumor<br>site        | Initiating<br>agent                     | Chemopreventive/<br>chemotherapeutic<br>agent | Effect on tumor<br>growth:<br>chemopreventive<br>agent(s)       | Effect on tumor growth:<br>MEL                                                                                              | Effect of<br>combination with<br>MEL compared to<br>single agent                        | Reference |
|-------------------------------------|----------------------|-----------------------------------------|-----------------------------------------------|-----------------------------------------------------------------|-----------------------------------------------------------------------------------------------------------------------------|-----------------------------------------------------------------------------------------|-----------|
| Clinical<br>study                   |                      | Melanoma<br>treated with<br>dacarbazine |                                               | Delayed response to chemotherapy                                |                                                                                                                             | -                                                                                       | [264]     |
| Case-report                         | Adrenals             | Adrenocortical<br>carcinoma             |                                               |                                                                 | -                                                                                                                           | 7-year remission post<br>diagnosis                                                      | [276]     |
| Female<br>FVB/N<br>HER2/neu<br>mice | Mammary<br>gland     | Spontaneous                             |                                               | ↑ latency<br>↑ survival                                         | ↑ survival                                                                                                                  | ≈                                                                                       |           |
| Male FVB/N<br>mice                  |                      | HER2/neu<br>transplants                 |                                               | ≈                                                               | ≈                                                                                                                           | ↓ tumor volume<br>↑ survival                                                            | [272]     |
| Male SHR<br>mice                    |                      | Ehrlich<br>carcinoma<br>transplants     |                                               | -                                                               | -                                                                                                                           | ↓ tumor volume<br>↑ survival (ns)                                                       |           |
|                                     | Mammary<br>carcinoma |                                         |                                               | ↓ tumor incidence<br>↑ survival (ns)                            |                                                                                                                             | -                                                                                       |           |
| Female<br>FVB/N mice                |                      | HER2/neu<br>transplants                 | Paclitaxel                                    | ↓ tumor incidence<br>↑ survival (ns)                            | ≈                                                                                                                           | ↓ tumor incidence<br>↑ survival (ns)                                                    | [275]     |
|                                     |                      |                                         | Metformin<br>+ paclitaxel                     | ↓ tumor incidence<br>↑ survival (ns)                            |                                                                                                                             | ↓ tumor incidence<br>(ns)<br>↑ survival (ns)                                            |           |
|                                     |                      | NMU+high-fat<br>diet                    |                                               | ↓ HG tumor<br>proportion<br>↓ tumor volume                      | ↓ HG tumor proportion<br>↓ proliferation<br>↓ incidence (ns)                                                                | ≈                                                                                       | [278]     |
|                                     |                      | DMBA+high-<br>fat diet                  | Metformin                                     | ↓ tumor volume<br>↑ apoptosis (ns)<br>↓ tumor incidence<br>(ns) | ↑ apoptosis<br>↓ tumor volume<br>↓ tumor incidence and<br>frequency (ns)<br>↑ latency (ns)<br>↓ HG tumor proportion<br>(ns) | ↑ apoptosis<br>↓ tumor incidence<br>and frequency (ns)<br>↓ HG tumor<br>proportion (ns) | [277]     |
| Female<br>Sprague-<br>Dawley rats   | Mammary<br>gland     | NMU+high-fat<br>diet                    | Pioglitazone                                  | ↑ apoptosis<br>↓ HG tumor<br>proportion                         | ↑ apoptosis<br>↑ latency (ns)                                                                                               | ↓ tumor incidence<br>and frequency (ns)<br>↓ HG tumor<br>proportion (ns)                | [325]     |
|                                     |                      | DMBA                                    |                                               | ↓ tumor incidence<br>and frequency<br>↑ latency                 | ↓ tumor frequency<br>↑ latency (ns)                                                                                         | ↓ tumor frequency<br>(ns)                                                               | [331]     |
|                                     |                      | NMU                                     | Retinyl acetate                               | ↑ latency (ns)                                                  | ↑ latency<br>↓ tumor incidence (ns)                                                                                         | ↓ tumor incidence<br>and frequency                                                      | [332]     |

| Species,<br>strain/study | Tumor<br>site | Initiating<br>agent | Chemopreventive/<br>chemotherapeutic<br>agent | Effect on tumor<br>growth:<br>chemopreventive<br>agent(s)                  | Effect on tumor growth:<br>MEL                                | Effect of<br>combination with<br>MEL compared to<br>single agent           | Reference |
|--------------------------|---------------|---------------------|-----------------------------------------------|----------------------------------------------------------------------------|---------------------------------------------------------------|----------------------------------------------------------------------------|-----------|
|                          |               |                     |                                               | ↓ tumor incidence,<br>frequency and<br>volume (ns)                         | -                                                             | ↓ tumor incidence<br>(ns)                                                  | [333]     |
|                          |               |                     | 9-cis-retinoic acid                           | ↓ tumor incidence,<br>frequency and tumor<br>area                          | ↓ tumor incidence,<br>frequency and tumor area                | ↓ tumor incidence,<br>frequency and tumor<br>area                          | [334]     |
|                          |               |                     |                                               | ↓ ERα mRNA<br>expression<br>↓ tumor frequency<br>(ns)                      | ↓ ERα mRNA expression<br>↓ tumor frequency and<br>volume (ns) | ↓ tumor frequency<br>and volume<br>↑ apoptosis<br>↓ ERα mRNA<br>expression | [335]     |
|                          |               |                     | Bexarotene                                    | ↓ tumor frequency<br>↓ HG tumor<br>proportion<br>↓ tumor incidence<br>(ns) | -                                                             | ↓ tumor incidence<br>↓ frequency (ns)                                      | [336]     |

Abbreviations: BOP, N-nitrosobis(2-oxopropyl)amine; BP, benz(a)pyrene; DMBA, 7,12-dimethylbenz(a)anthracene; ER, estrogen receptor; HG, high-grade; NMU, N-methyl, N-nitrosourea; ns, non-significant; -, no results; ≈, no effect; ↓, decrease in parameter; ↑, increase in parameter. Boldface indicate undesirable effect.
